# Supplementary material
Source: publisher figshare collection journal article supplement (https://plos.figshare.com/articles/dataset/_/5465230)
Supplement: Supplementary file [file 1]

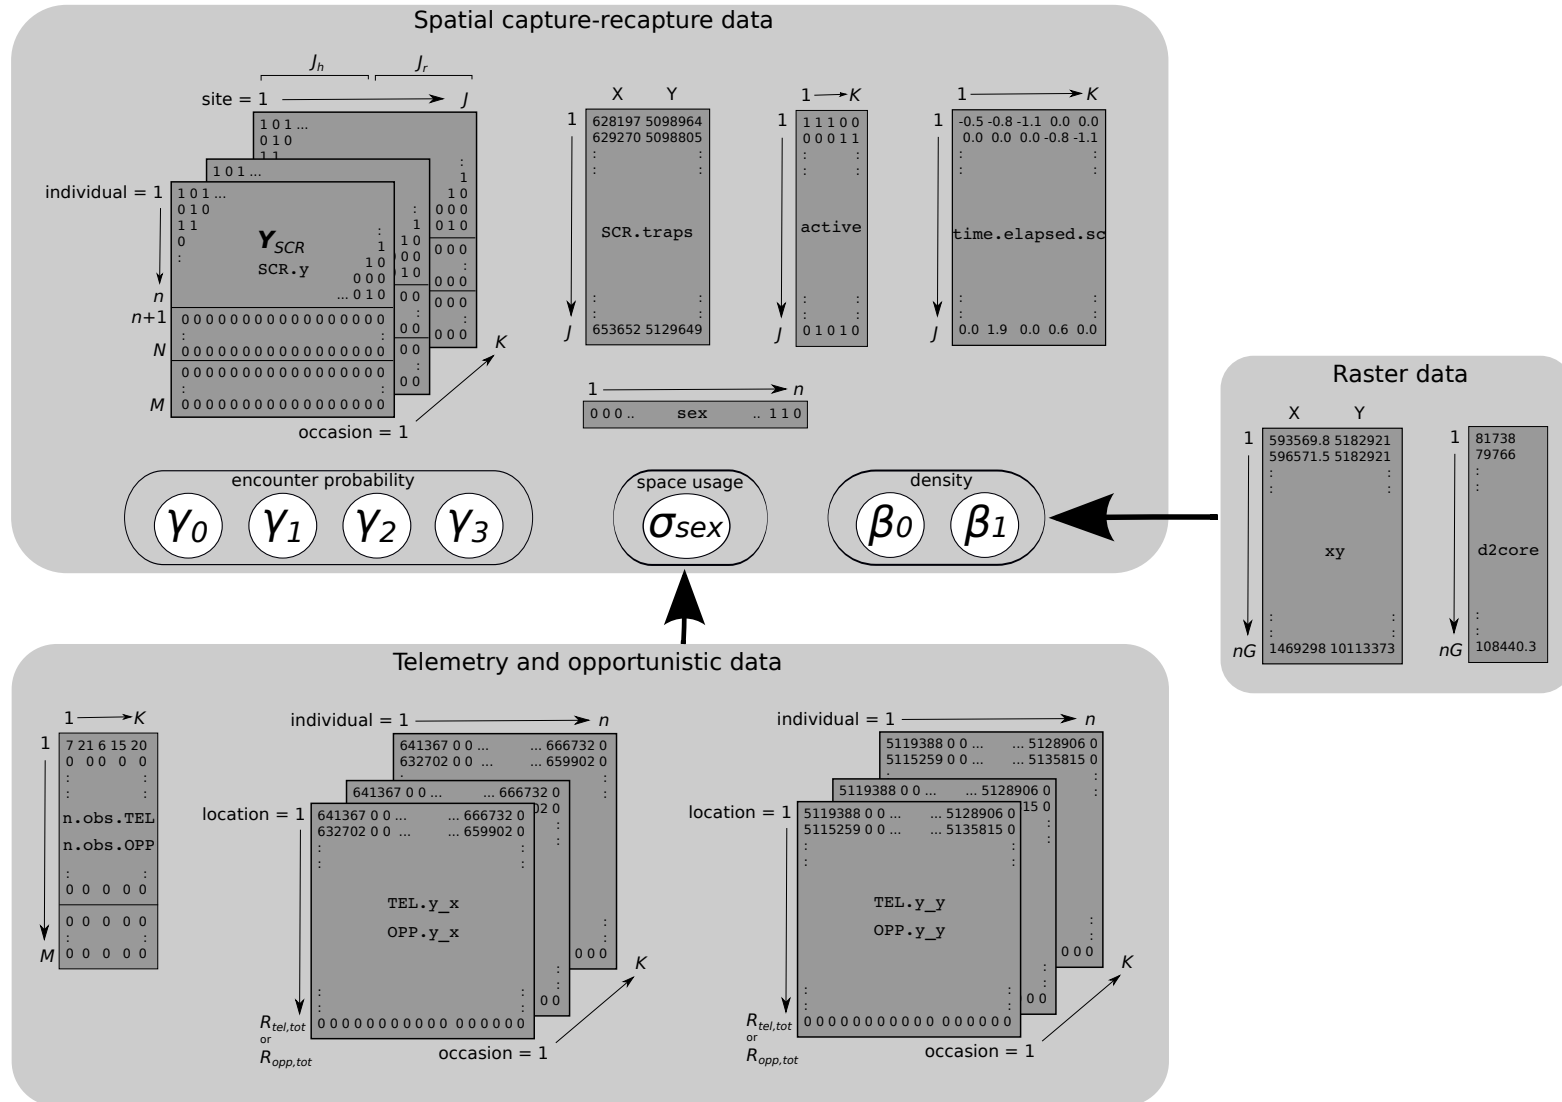

**S2 Fig. Graphical representation of the data involved in the integrated analysis.** Circles represent estimated parameters. Observed data for  $n$  individuals, detected during  $K$  visits and members of the population of size  $N$ , were augmented with  $M - n$  all-zero detections ( $Y_{SCR}$  matrix). SCR data were collected at  $J$  sites, consisting of  $J_h$  hair traps and  $J_r$  rub trees. Data set names in Courier font correspond to the names used in the model code. Coordinates, trap deployment, and (standardized) time since last check data sets for the  $J = J_h + J_r$  traps are denoted by `SCR.traps`, `active`, and `time.elapsed.sc` labels, respectively. Raster data contain information on the distance from the point where founders were released for each of the  $nG$  pixels (`d2core`) and was used to model density. Telemetry and opportunistic data were formatted in the same way, with an augmented matrix for number of records available for individual  $i$  in occasion  $k$  (`n.obs.TEL` and `n.obs.OPP`, respectively) and the x (`TEL.y_x`, `OPP.y_x`) and y (`TEL.y_y`, `OPP.y_y`) coordinates of those records for each individual in each of the  $R_{tel}$  or  $R_{opp}$  locations and occasion  $k$ .
