# Supplementary material
Source: publisher figshare collection journal article supplement (https://plos.figshare.com/articles/dataset/_/5465230)
Supplement: Supplementary file [file 1]

**S1 Table. Posterior parameter estimates achieved using structured (SCR) data alone or integrated with unstructured (telemetry and opportunistic; tel, opp) information available for the brown bear population in the Italian Alps.** Parameters are denoted as follows: effect of sex on the spatial scale parameter for structured data,  $\theta_1$ ; effect of data type on the spatial scale parameter,  $\theta_2$ ; baseline encounter probability ( $p_0$ ) intercept,  $\gamma_0$ ; effect of being male on  $p_0$ ,  $\gamma_1$ ; effect of trap type on  $p_0$ ,  $\gamma_2$ ; effect of time since last check on  $p_0$ ,  $\gamma_3$ ; density intercept,  $\beta_0$ ; effect of distance from the release point on density,  $\beta_1$ ; data augmentation parameter,  $\psi$ ; probability of being a male,  $\omega_{sex}$ .

| Parameter                                  | SCR + tel + opp (data consistency tested) |       |        |        |        |
|--------------------------------------------|-------------------------------------------|-------|--------|--------|--------|
|                                            | mean                                      | SD    | 2.5%   | 50%    | 97.5%  |
| $\theta_1$                                 | 0.218                                     | 0.075 | 0.070  | 0.219  | 0.364  |
| $\theta_2$                                 | 0.389                                     | 0.098 | 0.187  | 0.393  | 0.570  |
| $\gamma_0$                                 | -3.246                                    | 0.339 | -3.927 | -3.237 | -2.600 |
| $\gamma_1$                                 | 1.572                                     | 0.315 | 0.976  | 1.565  | 2.206  |
| $\gamma_2$                                 | -1.254                                    | 0.395 | -2.024 | -1.256 | -0.474 |
| $\gamma_3$                                 | 0.652                                     | 0.189 | 0.274  | 0.652  | 1.020  |
| $\beta_0$                                  | -3.196                                    | 0.748 | -4.802 | -3.147 | -1.874 |
| $\beta_1$                                  | -1.196                                    | 0.491 | -2.210 | -1.176 | -0.286 |
| $\psi$                                     | 0.225                                     | 0.080 | 0.118  | 0.209  | 0.425  |
| $\omega_{sex}$                             | 0.343                                     | 0.096 | 0.174  | 0.336  | 0.547  |
| SCR + tel + opp (data consistency implied) |                                           |       |        |        |        |
| $\gamma_0$                                 | -3.714                                    | 0.308 | -4.335 | -3.705 | -3.125 |
| $\gamma_1$                                 | 1.623                                     | 0.312 | 1.024  | 1.618  | 2.246  |
| $\gamma_2$                                 | -1.153                                    | 0.387 | -1.899 | -1.155 | -0.384 |
| $\gamma_3$                                 | 0.619                                     | 0.185 | 0.248  | 0.621  | 0.976  |
| $\beta_0$                                  | -3.245                                    | 0.670 | -4.719 | -3.192 | -2.081 |
| $\beta_1$                                  | -1.128                                    | 0.467 | -2.125 | -1.107 | -0.276 |
| $\psi$                                     | 0.198                                     | 0.064 | 0.109  | 0.186  | 0.351  |
| $\omega_{sex}$                             | 0.341                                     | 0.096 | 0.171  | 0.335  | 0.542  |
| SCR + opp (data consistency implied)       |                                           |       |        |        |        |
| $\gamma_0$                                 | -3.414                                    | 0.345 | -4.116 | -3.406 | -2.758 |
| $\gamma_1$                                 | 1.417                                     | 0.360 | 0.734  | 1.409  | 2.143  |
| $\gamma_2$                                 | -1.160                                    | 0.392 | -1.923 | -1.164 | -0.390 |
| $\gamma_3$                                 | 0.621                                     | 0.189 | 0.248  | 0.623  | 0.985  |
| $\beta_0$                                  | -2.713                                    | 0.600 | -3.960 | -2.687 | -1.562 |
| $\beta_1$                                  | -0.739                                    | 0.435 | -1.620 | -0.731 | 0.113  |
| $\psi$                                     | 0.252                                     | 0.106 | 0.124  | 0.227  | 0.542  |
| $\omega_{sex}$                             | 0.291                                     | 0.096 | 0.125  | 0.285  | 0.498  |
| SCR + tel (data consistency implied)       |                                           |       |        |        |        |
| $\gamma_0$                                 | -3.479                                    | 0.332 | -4.139 | -3.478 | -2.833 |
| $\gamma_1$                                 | 1.791                                     | 0.343 | 1.119  | 1.787  | 2.472  |
| $\gamma_2$                                 | -1.207                                    | 0.402 | -1.991 | -1.207 | -0.413 |
| $\gamma_3$                                 | 0.670                                     | 0.193 | 0.288  | 0.671  | 1.046  |
| $\beta_0$                                  | -2.956                                    | 0.627 | -4.313 | -2.899 | -1.869 |
| $\beta_1$                                  | -0.890                                    | 0.460 | -1.842 | -0.866 | -0.043 |
| $\psi$                                     | 0.218                                     | 0.074 | 0.115  | 0.204  | 0.406  |
| $\omega_{sex}$                             | 0.364                                     | 0.098 | 0.187  | 0.359  | 0.569  |
| SCR                                        |                                           |       |        |        |        |
| $\gamma_0$                                 | -2.220                                    | 0.407 | -3.040 | -2.213 | -1.451 |
| $\gamma_1$                                 | 0.804                                     | 0.441 | -0.046 | 0.799  | 1.683  |
| $\gamma_2$                                 | -1.207                                    | 0.421 | -2.037 | -1.204 | -0.389 |
| $\gamma_3$                                 | 0.658                                     | 0.203 | 0.263  | 0.656  | 1.060  |
| $\beta_0$                                  | -2.076                                    | 0.549 | -3.259 | -2.032 | -1.119 |
| $\beta_1$                                  | -0.459                                    | 0.387 | -1.267 | -0.437 | 0.244  |
| $\psi$                                     | 0.406                                     | 0.168 | 0.177  | 0.371  | 0.850  |
| $\omega_{sex}$                             | 0.223                                     | 0.084 | 0.090  | 0.212  | 0.414  |
