# Supplementary material
Source: publisher figshare collection journal article supplement (https://plos.figshare.com/articles/dataset/_/5465230)
Supplement: Supplementary file [file 1]

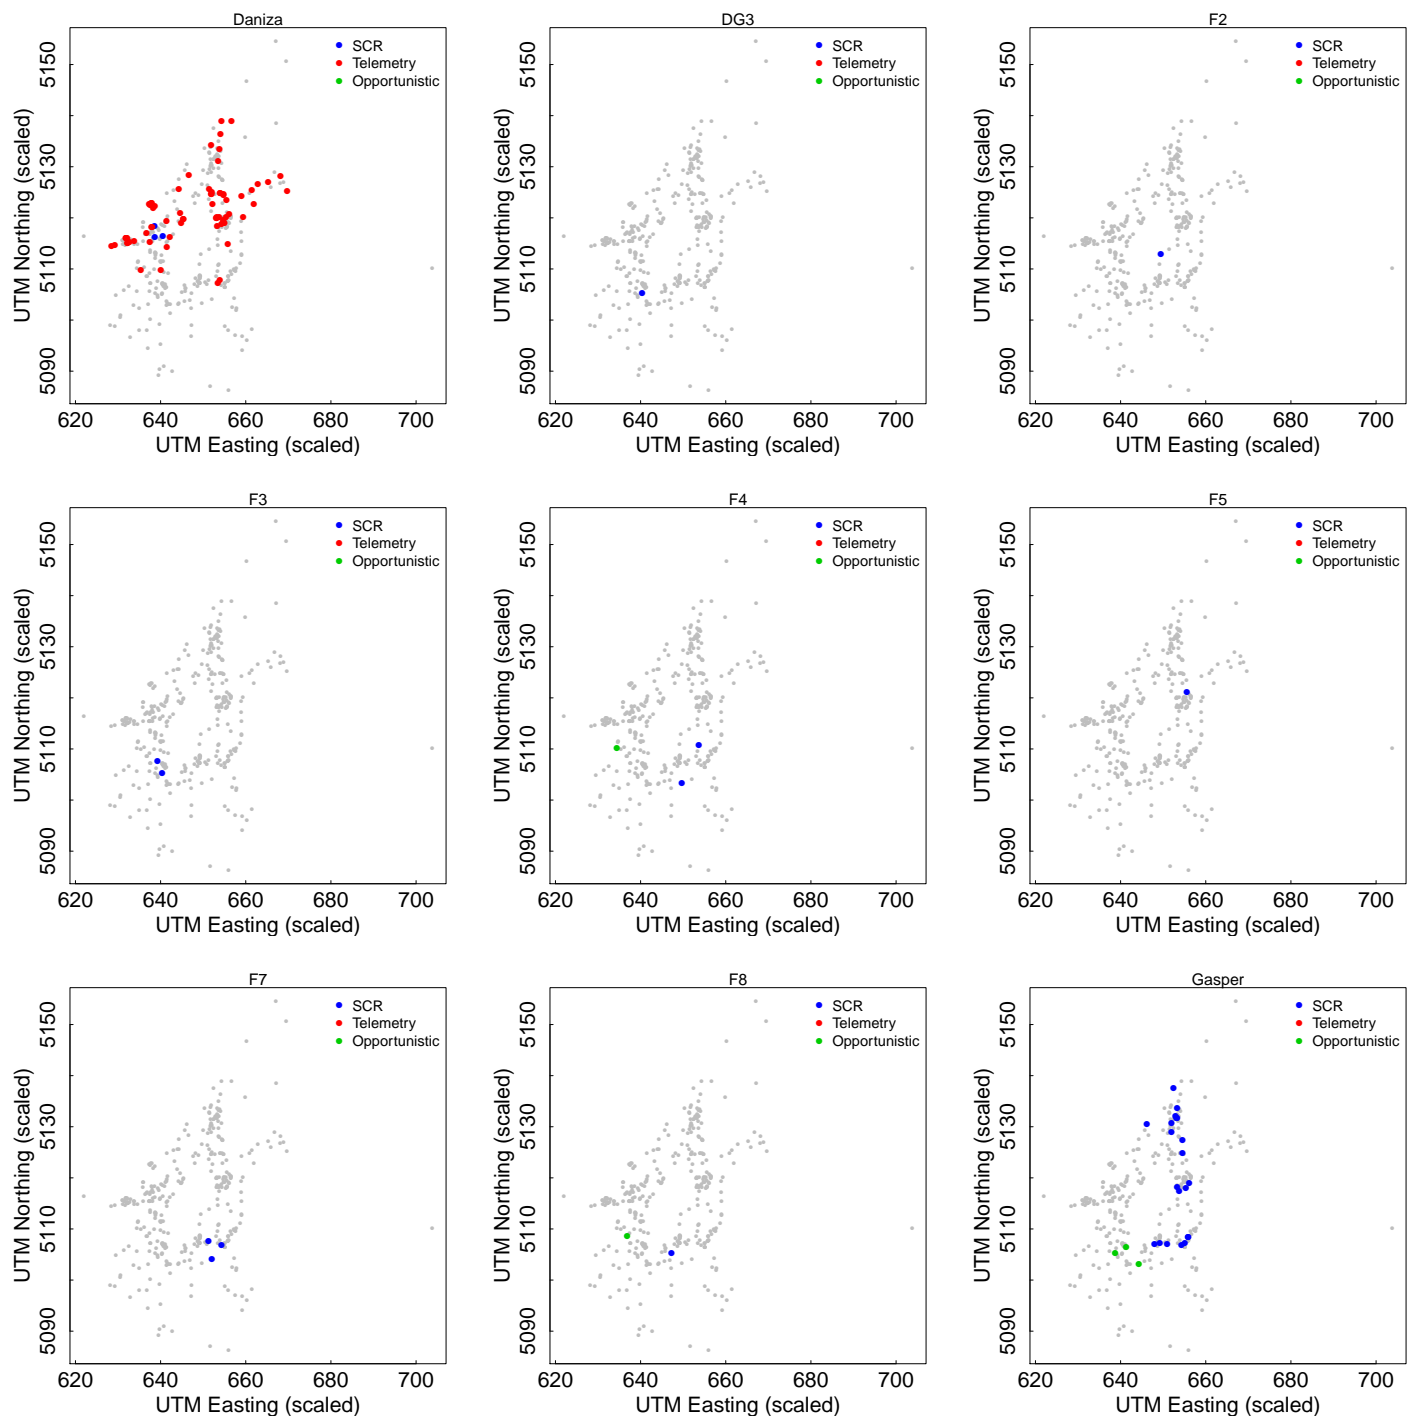

S1 Fig (continue)

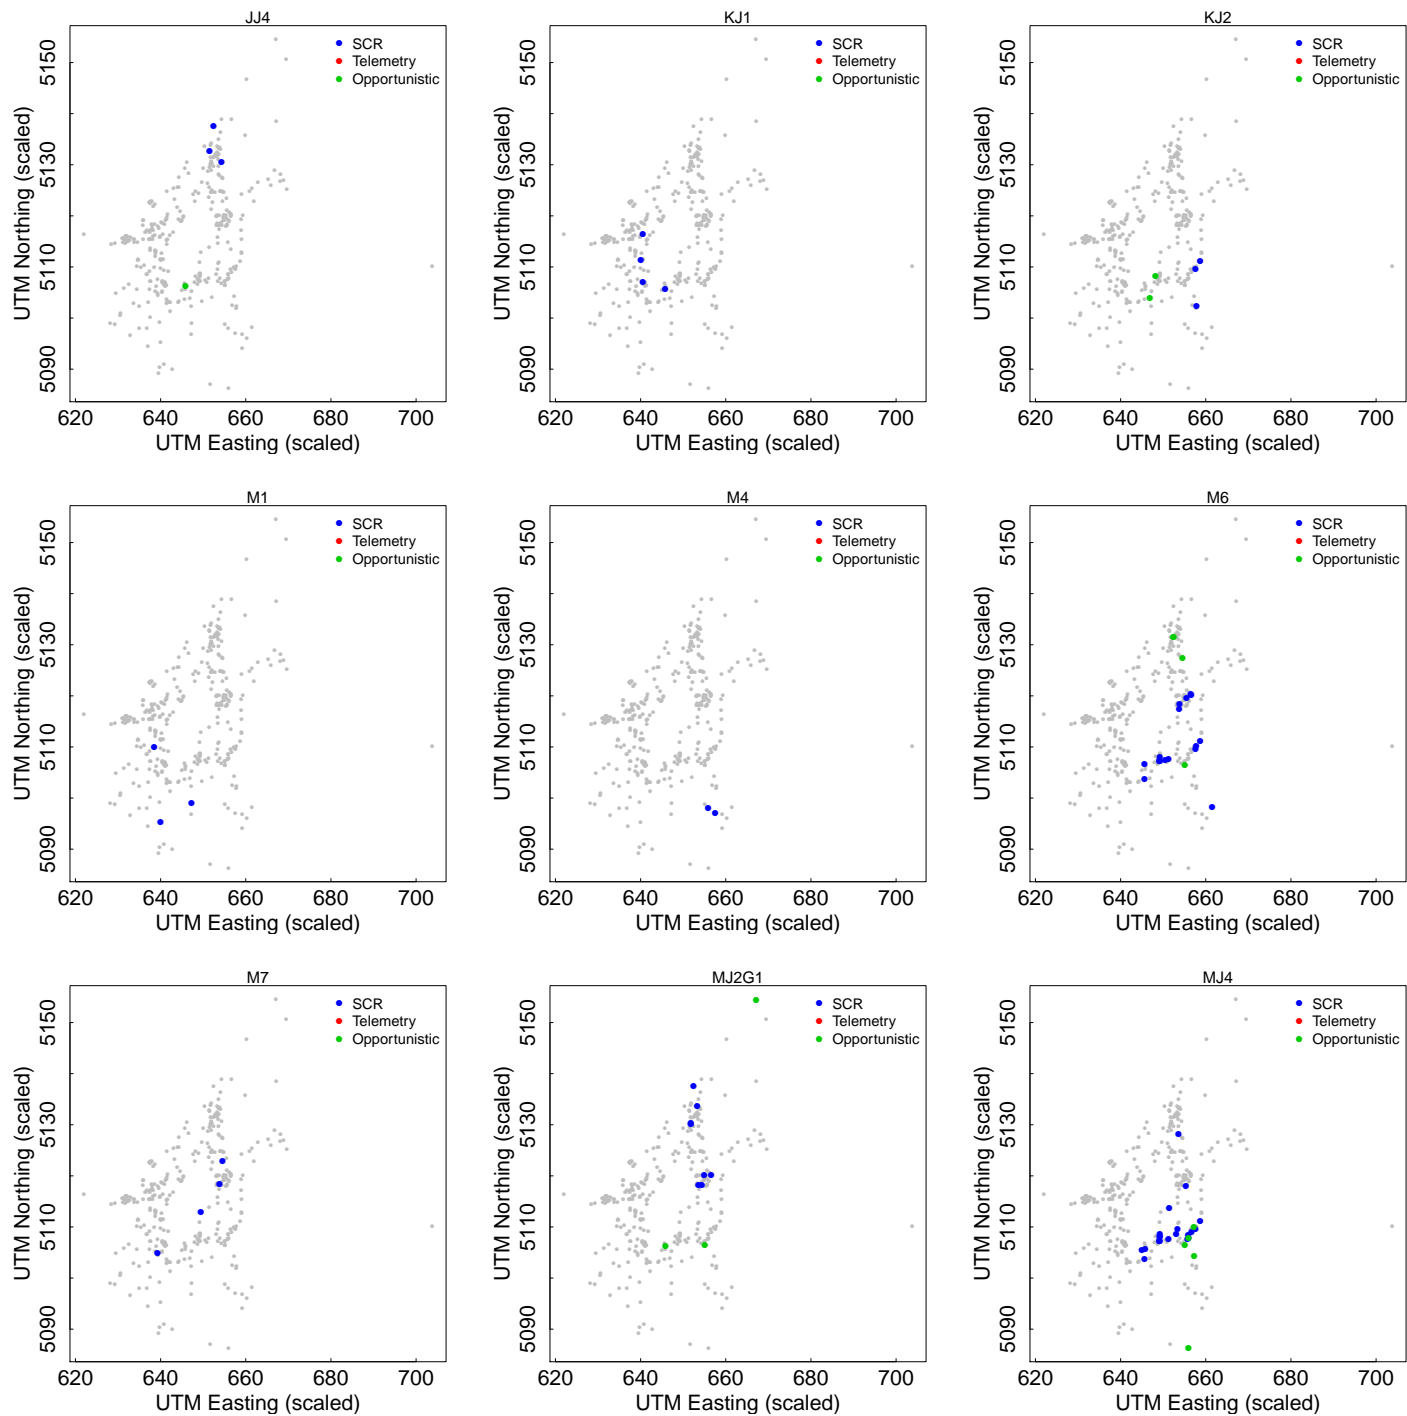

S1 Fig (continue)

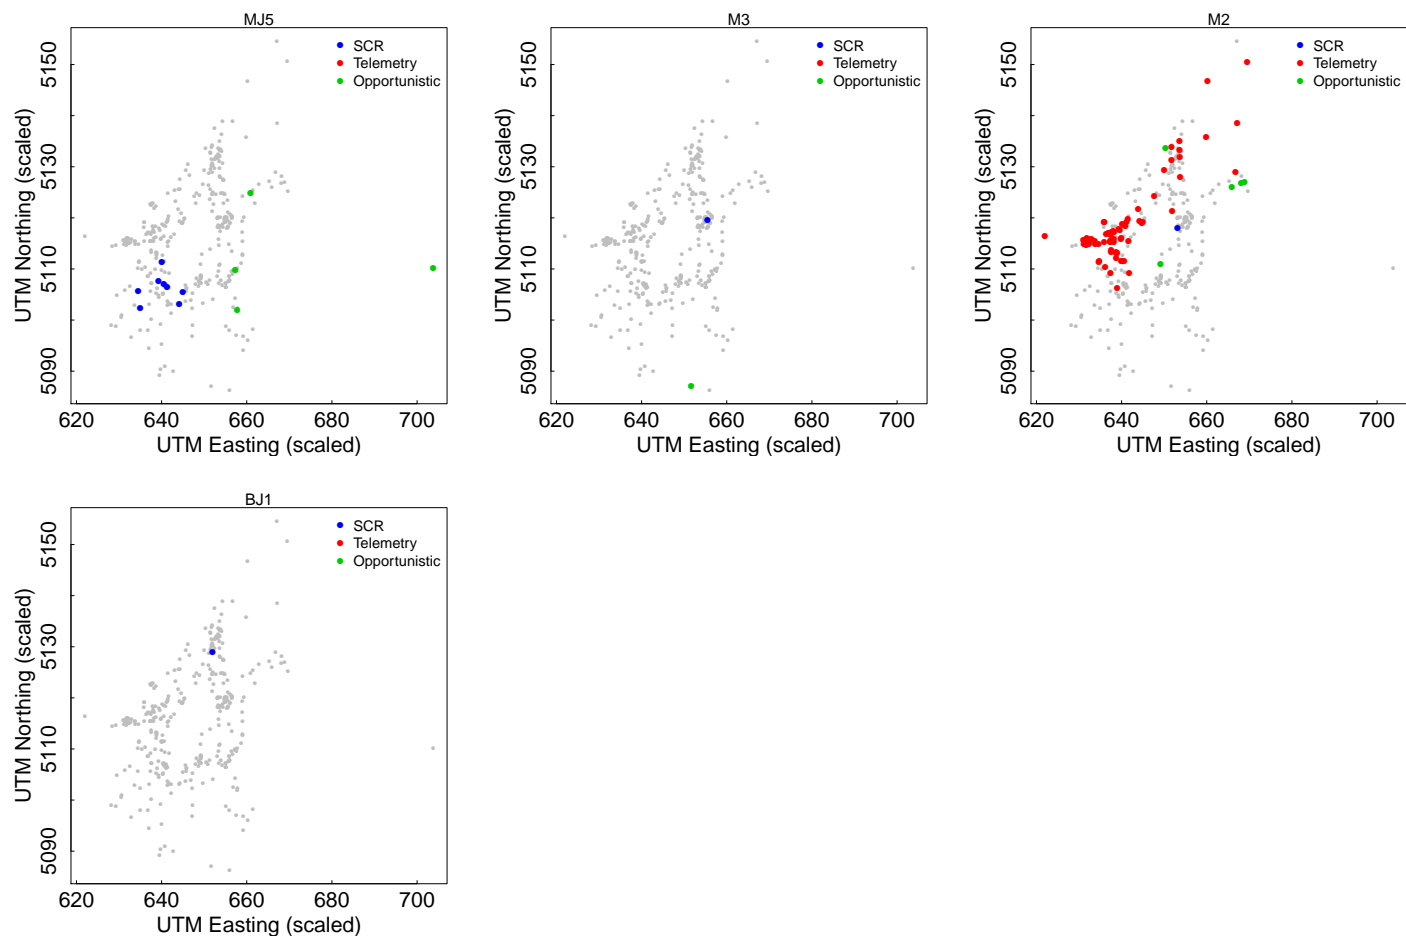

**S1 Fig. Location of bear captures from systematic sampling with hair traps and rub trees (SCR), telemetry and opportunistic records.** Grey dots indicate the location of all observed individuals. Bear ID is reported on the top of each plot.
