# Supplementary material
Source: publisher figshare collection journal article supplement (https://plos.figshare.com/articles/dataset/_/5465230)
Supplement: Supplementary file [file 1]

## **S1 Text. Details on the Bayesian variable selection**

Prior probability for  $\theta_2$  was specified as a mixture of normal distributions:

$$\Pr(\theta_2|w) = (1 - w) \text{Normal}(0, 1) + w \text{Normal}(0, \Sigma)$$

where the fixed prior variance  $\Sigma = V/(l + 1)$ , with  $l$  denoting the number of regressors in Eq. 8 in the main text ( $l = 1$  if  $w = 0$ , and  $l = 2$  if  $w = 1$ ) and the total variance in the linear predictor  $V$  with a  $\text{Gamma}(3.2890, 7.8014)$  prior assigned [1].

## **REFERENCES**

1. Link WA, Barker RJ. Model weights and the foundations of multimodel inference. *Ecology*. 2006;87(10):2626–2635.
