# Supplementary material
Source: publisher figshare collection journal article supplement (https://plos.figshare.com/articles/dataset/_/5465230)
Supplement: Supplementary file [file 1]

## S2 Text. R and BUGS codes for the fully integrated models

We provide the code to fit the models where: (i) data consistency is assumed, (ii) data consistency is tested, (iii) data inconsistency is accounted for.

```
1 #####
#----- 1) Fully integrated model: data consistency assumed -----#
#####
cat("
5 model{
  ### PRIORS
    for(cv in 1:4){ # detection coefficients
      p.b[cv] ~ dnorm(0,0.01)
    }
10   for(cv in 1:2){ # density coefficients
      d.b[cv] ~ dnorm(0,0.01)
    }
  ### Density
    for(np in 1:nPix){
15     mu.d[np] <- exp(d.b[1] +
                      d.b[2] * d2core[np])
      probs[np] <- mu.d[np] / EN
    }
    EN <- sum(mu.d[])
20   psi <- EN/M
  ### SIGMA
    for(sx in 1:2){ # sex-specific sigma
      a1[sx] ~ dnorm(0,.1)
      sigma[sx] <- sqrt(1/(2*a1[sx]))
25   }
  ### SEX
    psi.sex ~ dunif(0,1)
  ### LIKELIHOOD
    for(i in 1:M){ # individuals
30     z[i] ~ dbern(psi)
      sex[i] ~ dbern(psi.sex) # 0=female
      pick.s[i] ~ dcat(probs[])
      s[i,1] <- G[pick.s[i],1]
      s[i,2] <- G[pick.s[i],2]
35     for(k in 1:K){ # occasions
        # SCR observations (hair traps and rub trees)
```

```

for(j in 1:ntraps){
  d[i,j,k] <- sqrt(pow(s[i,1] - scr.locs[j,1],2) + pow(s[i,2] - scr.locs[j,2],2))
  logit(p0[i,j,k]) <- (p.b[1] +
40      p.b[2] * sex[i] +
      p.b[3] * trap.type[j] +
      p.b[4] * time.elapsed[j,k])
  p[i,j,k] <- p0[i,j,k] * exp(-a1[sex[i]+1] * d[i,j,k]*d[i,j,k])
  mu.p[i,j,k] <- z[i] * p[i,j,k] * active[j,k]
45  scrY[i,j,k] ~ dbern(mu.p[i,j,k])
}

# TELEMETRY observations
for(tel in 1:n.obs.TEL[i,k]){
  tely.x[tel,i,k] ~ dnorm(s[i,1], 1/(sigma[sex[i]+1]^2))
50  tely.y[tel,i,k] ~ dnorm(s[i,2], 1/(sigma[sex[i]+1]^2))
}

# OPPORTUNISTIC observations
for(opp in 1:n.obs.OPP[i,k]){
  oppY.x[opp,i,k] ~ dnorm(s[i,1], 1/(sigma[sex[i]+1]^2))
55  oppY.y[opp,i,k] ~ dnorm(s[i,2], 1/(sigma[sex[i]+1]^2))
}

}} #k & i
### Derive population size (N) density (D)
N <- sum(z[])
60 D <- N/area
N_female <- N - N_male
D_female <- N_female/area
N_male <- sum(z[]*sex[])
D_male <- N_male/area
65 }

",file="integratedSCR.txt")

#####
70 #--- 2) Fully integrated model: testing for data consistency ----#
#####

cat("
model{
### PRIORS
75 for(cv in 1:4){ # detection coefficients
  p.b[cv] ~ dnorm(0,0.01)

```

```

}
for(cv in 1:2){ # density coefficients
  d.b[cv] ~ dnorm(0,0.01)
80 }
### Density
for(np in 1:nPix){
  mu.d[np] <- exp(d.b[1] +
                  d.b[2] * d2core[np])
85 probs[np] <- mu.d[np] / EN
}
EN <- sum(mu.d[])
psi <- EN/M
### SIGMA
90 int.sigma ~ dunif(0,15)
beta.sex.hair ~ dunif(-3,3)

# Prior for data type effect
predictorsIn <- 1 + w
95 beta.type ~ dnorm(0,psuedoTau)T(-3,3)
tauV ~ dgamma(3.2890,7.8014)
psuedoTau <- ifelse(w==1,
                    1/((1/tauV) / predictorsIn),
                    0.01*100)
100 # Priors for variable indicators
w ~ dbern(0.5)
### SEX
psi.sex ~ dunif(0,1)
### LIKELIHOOD
105 for(i in 1:M){ # individuals
  z[i] ~ dbern(psi)
  sex[i] ~ dbern(psi.sex) # 0 = female
  pick.s[i] ~ dcat(probs[])
  s[i,1] <- G[pick.s[i],1]
110 s[i,2] <- G[pick.s[i],2]
  log(sigma_hair[i]) <- log(int.sigma) + beta.sex.hair * sex[i]
  log(sigma_telopp[i]) <- log(sigma_hair[i]) + w * beta.type
  a1[i] <- 1/(2*sigma_hair[i]*sigma_hair[i])
  for(k in 1:K){ # occasions
115   # SCR observations (hair traps and rub trees)
   for(j in 1:ntraps){

```

```

d[i,j,k] <- sqrt( pow(s[i,1] - scr.locs[j,1],2) + pow(s[i,2] - scr.locs[j,2],2) )
logit(p0[i,j,k]) <- (p.b[1] +
                      p.b[2] * sex[i] +
120      p.b[3] * trap.type[j] +
                      p.b[4] * time.elapsed[j,k])
p[i,j,k] <- p0[i,j,k] * exp(-a1[i] * d[i,j,k]*d[i,j,k])
mu.p[i,j,k] <- z[i] * p[i,j,k] * active[j,k]
scrY[i,j,k] ~ dbern(mu.p[i,j,k])
125 }

# TELEMETRY observations
for(tel in 1:n.obs.TEL[i,k]){
  tely.x[tel,i,k] ~ dnorm(s[i,1], 1/(sigma_telopp[i]^2))
  tely.y[tel,i,k] ~ dnorm(s[i,2], 1/(sigma_telopp[i]^2))
130 }

# OPPORTUNISTIC observations
for(opp in 1:n.obs.OPP[i,k]){
  oppY.x[opp,i,k] ~ dnorm(s[i,1], 1/(sigma_telopp[i]^2))
  oppY.y[opp,i,k] ~ dnorm(s[i,2], 1/(sigma_telopp[i]^2))
135 }

}} #k & i
### Derive population size (N) density (D)
N <- sum(z[])
D <- N/area
140 N_female <- N - N_male
D_female <- N_female/area
N_male <- sum(z[]*sex[])
D_male <- N_male/area
}

145 ",file="integratedSCR_GVS.txt")

#####
150 #---- 3) Fully integrated model: accounting for data inconsistency ----#
#####
cat("
model{
### PRIORS
155   for(cv in 1:4){ # detection coefficients
     p.b[cv] ~ dnorm(0,0.01)

```

```

}
for(cv in 1:2){ # density coefficients
  d.b[cv] ~ dnorm(0,0.01)
160 }
### Density
for(np in 1:nPix){
  mu.d[np] <- exp(d.b[1] +
                  d.b[2] * d2core[np])
165 probs[np] <- mu.d[np] / EN
}
EN <- sum(mu.d[])
psi <- EN/M
### SIGMA
170 int.sigma ~ dunif(0,15)
beta.sex.hair ~ dunif(-3,3)
beta.type[sx] ~ dunif(-3,3)
### SEX
psi.sex ~ dunif(0,1)
175 ### LIKELIHOOD
for(i in 1:M){ # individuals
  z[i] ~ dbern(psi)
  sex[i] ~ dbern(psi.sex) # 0 is female
  pick.s[i] ~ dcat(probs[])
180 s[i,1] <- G[pick.s[i],1]
s[i,2] <- G[pick.s[i],2]
log(sigma_hair[i]) <- log(int.sigma) + beta.sex.hair * sex[i]
log(sigma_telopp[i]) <- log(sigma_hair[i]) + beta.type
a1[i] <- 1/(2*sigma_hair[i]*sigma_hair[i])
185 for(k in 1:K){ # occasions
  # SCR observations (hair traps and rub trees)
  for(j in 1:ntraps){
    d[i,j,k] <- sqrt( pow(s[i,1] - scr.locs[j,1],2) + pow(s[i,2] - scr.locs[j,2],2) )
    logit(p0[i,j,k]) <- (p.b[1] +
190 p.b[2] * sex[i] +
p.b[3] * trap.type[j] +
p.b[4] * time.elapsed[j,k])
p[i,j,k] <- p0[i,j,k] * exp(-a1[i] * d[i,j,k]*d[i,j,k])
mu.p[i,j,k] <- z[i] * p[i,j,k] * active[j,k]
195 scrY[i,j,k] ~ dbern(mu.p[i,j,k])
}

```

```

# TELEMETRY observations
for(tel in 1:n.obs.TEL[i,k]){
  tely.x[tel,i,k] ~ dnorm(s[i,1], 1/(sigma_telopp[i]^2))
  tely.y[tel,i,k] ~ dnorm(s[i,2], 1/(sigma_telopp[i]^2))
}
# OPPORTUNISTIC observations
for(opp in 1:n.obs.OPP[i,k]){
  oppY.x[opp,i,k] ~ dnorm(s[i,1], 1/(sigma_telopp[i]^2))
  oppY.y[opp,i,k] ~ dnorm(s[i,2], 1/(sigma_telopp[i]^2))
}
}} #k & i
### Derive population size (N) density (D)
N <- sum(z[])
D <- N/area
N_female <- N - N_male
D_female <- N_female/area
N_male <- sum(z[]*sex[])
D_male <- N_male/area
},file="integratedSCR_2.txt")

#####
#----- start part in common to all models -----#
#####
# Load R packages
library(scrbook)
library(secr)
library(car)
library(jagsUI)
library(abind)
# Starting data
load("bear_data_Tenan_et_al.RData")
# Data Augmentation
M <- 200
nind <- nrow(SCR.y)
aug <- M-nind
ntraps <- dim(SCR.y)[2]
K <- dim(SCR.y)[3]

```

```

SCR.y <- abind(SCR.y,array(0,c(aug,ntraps,K)),along=1)
SCR.y[SCR.y>0] <- 1
sex <- c(sex,rep(NA,aug))
240 active <- ifelse(is.na(time.elapsed[, -1]),0,1)
time.elapsed.sc <- time.elapsed[, -1]
time.elapsed.sc[] <- scale(unlist(c(time.elapsed.sc)))
time.elapsed.sc[is.na(time.elapsed.sc)] <- 0
n.obs.TEL <- rbind(n.obs.TEL,matrix(0,aug,K))
245 n.obs.OPP <- rbind(n.obs.OPP,matrix(0,aug,K))
# Manipulate the state space
all.obs <- cbind(c(SCR.traps[,2],c(TEL.y_x[TEL.y_x!=0]),c(OPP.y_x[OPP.y_x!=0])),
                c(SCR.traps[,3],c(TEL.y_y[TEL.y_y!=0]),c(OPP.y_y[OPP.y_y!=0])))
cut.S <- apply(e2dist(xy,all.obs),1,min)<=21000
250 xy.cut <- xy[cut.S,]
zz <- ifelse(!is.na(sex),1,NA)
# Data
bugs.data <- list(scrY = SCR.y,
                  telY.x = TEL.y_x/1000,
255 telY.y = TEL.y_y/1000,
oppY.x = OPP.y_x/1000,
oppY.y = OPP.y_y/1000,
M = M, K = K,
ntraps = ntraps,
260 area = nrow(xy)*4,#km^2
scr.locs = SCR.traps[, -1]/1000,
n.obs.TEL = n.obs.TEL,
n.obs.OPP = n.obs.OPP,
sex = sex,
265 time.elapsed = time.elapsed.sc,
trap.type = trap.type,
active = active,
G = xy[cut.S,]/1000,
nPix = nrow(xy[cut.S,]),
270 d2core = as.numeric(scale(d2core[cut.S])))
# Initial values function
init.pick.s <- numeric(M)
for(i in 1:nind){
  if (sum(bugs.data$scrY[i,]) == 0)
275 next
tmpDmat <- e2dist(bugs.data$G,

```

```

                cbind(
                rep(bugs.data$scr.locs[,1], apply(bugs.data$scrY[i,, ],1,sum)),
                rep(bugs.data$scr.locs[,2], apply(bugs.data$scrY[i,, ],1,sum))
                )
        )

        tmp.s <- which.min(apply(tmpDmat,1,min))
        init.pick.s[i] <- tmp.s
    }
285 init.pick.s[init.pick.s==0] <- sample(sum(init.pick.s==0),1:nrow(xy[cut.S,]))
    zst <- c(rep(NA, nind), rbinom(aug, 1, 0.5))
    #####
    #----- end part in common to all models -----#
    #####

290

    #####
    #----- 1) Fit model with data consistency assumed -----#
    #####

295 # initial values
    inits <- function() {
        list(psi.sex=runif(0.5),
             sex=c(rep(NA,nind),rbinom(aug,1,0.5)),
             a1= c(0.007,0.005),
300             p.b = c(-1,0.1,-0.1,0.1),
             d.b = c(-6,0),
             pick.s = init.pick.s,
             z = c(rep(1,bugs.data$M)))
    }

305 # parameters to monitor
    parameters<-c("N_male","N_female","sigma","p.b","d.b", "psi","psi.sex")
    # MCMC settings
    n.adapt <- 1000
    n.burnin <- 2000
310 n.iter <- 30000
    thin <- 1
    chains <- 3
    # Fit the model
    out.all <- jags(data = bugs.data,
315             inits = inits,
             parameters.to.save = parameters,

```



```

model.file = "integratedSCR.txt",
n.chains = chains,
n.adapt = n.adapt,
n.iter = n.iter,
n.burnin = n.burnin,
n.thin = thin,
parallel=T)

```

```

#####
#----- 2) Fit model for testing data consistency -----#
#####
# initial values

```

```

inits <- function() {
  list(psi.sex=runif(0.5),
       sex=c(rep(NA,nind),rbinom(aug,1,0.5)),
       tauV = runif(1,0.1,1.1),
       int.sigma=runif(1,5,8),beta.sex.hair=0,beta.type=0,
       p.b = c(-1,0.1,-0.1,0.1),
       d.b = c(-6,0),
       pick.s = init.pick.s,
       z = c(rep(1,bugs.data$M)))
}

# parameters to monitor
parameters<-c("N_male","N_female","int.sigma","beta.sex.hair",
              "beta.sex.telopp","beta.type","p.b","d.b",
              "psi","psi.sex","w")

```

```

# MCMC settings

```

```

n.adapt <- 1000
n.burnin <- 2000
n.iter <- 30000
thin <- 1
chains <- 3

```

```

# Fit the model

```

```

out.all <- jags(data = bugs.data,
               inits = inits,
               parameters.to.save = parameters,
               model.file = "integratedSCR_GVS.txt",
               n.chains = chains,
               n.adapt = n.adapt,

```

```

n.iter = n.iter,
n.burnin = n.burnin,
n.thin = thin,
parallel=T)

#####
#----- 3) Fit model accounting for data inconsistency -----#
#####
# initial values
inits <- function() {
  list(psi.sex=runif(0.5),
       sex=c(rep(NA,nind),rbinom(aug,1,0.5)),
       int.sigma=runif(1,5,8),beta.sex.hair=0,beta.type=0,
       p.b = c(-1,0.1,-0.1,0.1),
       d.b = c(-6,0),
       pick.s = init.pick.s,
       z = c(rep(1,bugs.data$M)))
}
# parameters to monitor
parameters<-c("N_male","N_female","int.sigma","beta.sex.hair",
              "beta.sex.telopp","beta.type",
              "p.b","d.b", "psi","psi.sex")
# MCMC settings
n.adapt <- 1000
n.burnin <- 2000
n.iter <- 30000
thin <- 1
chains <- 3
# Fit the model
out.all <- jags(data = bugs.data,
                inits = inits,
                parameters.to.save = parameters,
                model.file = "integratedSCR_2.txt",
                n.chains = chains,
                n.adapt = n.adapt,
                n.iter = n.iter,
                n.burnin = n.burnin,
                n.thin = thin,
                parallel=T)

```
